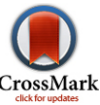

## Correction

# Correction: Identifying Individuals with Antisocial Personality Disorder Using Resting-State fMRI

### The PLOS ONE Staff

Yan Tang and Weixiong Jiang should be noted as co-first authors and have contributed equally to this work. Yan Tang and Weixiong Jiang are incorrectly noted as corresponding authors. Wei Wang is the sole Corresponding author for this article and can be reached by email here: [wawe01cn@yahoo.com.cn](mailto:wawe01cn@yahoo.com.cn)

The publisher apologizes for this error.

### Reference

1. Tang Y, Jiang W, Liao J, Wang W, Luo A (2013) Identifying Individuals with Antisocial Personality Disorder Using Resting-State fMRI. PLoS ONE 8(4): e60652. doi:10.1371/journal.pone.0060652

**Citation:** The PLOS ONE Staff (2014) Correction: Identifying Individuals with Antisocial Personality Disorder Using Resting-State fMRI. PLoS ONE 9(4): e96962. doi:10.1371/journal.pone.0096962

**Published:** April 29, 2014

**Copyright:** © 2014 The PLOS ONE Staff. This is an open-access article distributed under the terms of the Creative Commons Attribution License, which permits unrestricted use, distribution, and reproduction in any medium, provided the original author and source are credited.
